# Supplementary material for: Graphene chemiresistors modified with functionalized triphenylene for highly sensitive and selective detection of dimethyl methylphosphonate
Source: Royal Society of Chemistry journal article supplement (doi:10.1039/c9ra07186e), 2019-01-01
Supplement: c9ra07186e1.pdf [file c9ra07186e1.pdf]

## Supporting information

# Graphene chemiresistors modified with functionalized triphenylene for highly sensitive and selective detection of dimethyl methylphosphonate

Yun-Tae Kim,<sup>a</sup> Seongwoo Lee,<sup>b</sup> Sanghwan Park,<sup>a</sup> and Chang Young Lee<sup>\*a</sup>

<sup>a</sup>School of Energy and Chemical Engineering, Ulsan National Institute of Science and Technology (UNIST), Ulsan 44919, Republic of Korea

<sup>b</sup>School of Materials Science and Engineering, Ulsan National Institute of Science and Technology (UNIST), Ulsan 44919, Republic of Korea

\*Corresponding authors: [cylee@unist.ac.kr](mailto:cylee@unist.ac.kr)

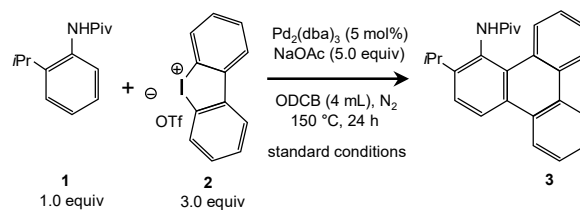

**Fig. S1.** Synthesis of N-substituted triphenylene. Refer to Ref. 14 for details.

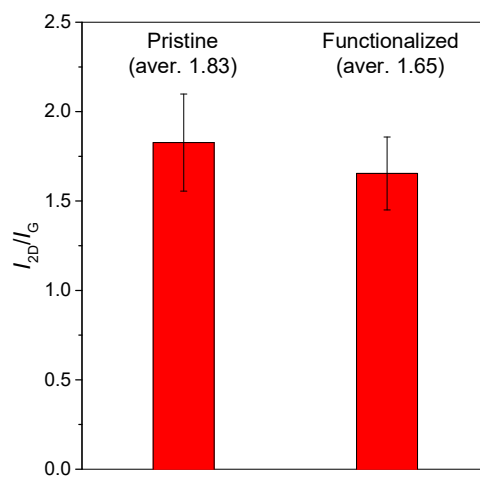

**Fig. S2.**  $I_{2D}/I_G$  ratio before and after the functionalization. The decreased  $I_{2D}/I_G$  ratio by the functionalization implies n- or p-doping of graphene.

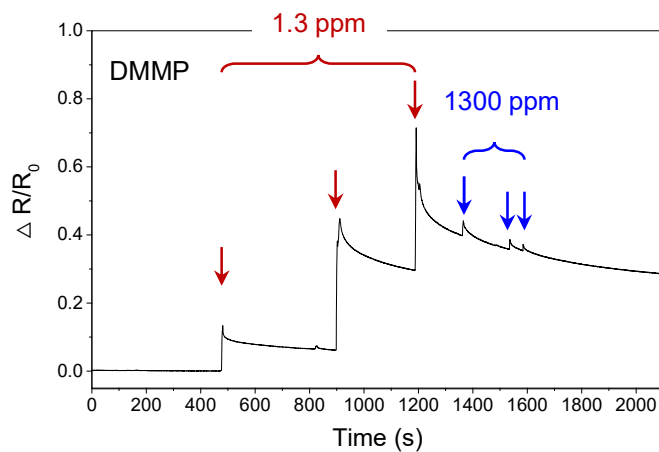

**Fig. S3.** Responses to DMMP at a high concentration (1300 ppm) after partially irreversible responses at a low concentration (1.3 ppm).

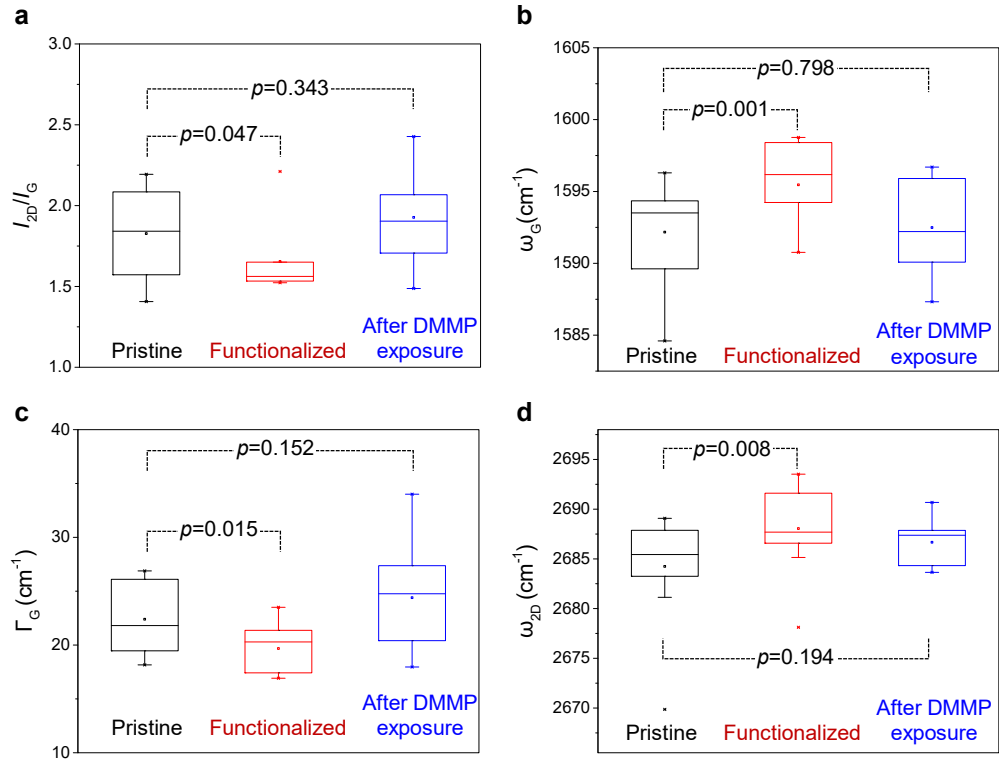

**Figure S4.** Recovery of Raman peak parameters of graphene when pristine (black), functionalized (red), and after the exposure to DMMP (blue). (a) 2D/G intensity ratio ( $I_{2D}/I_G$ ). (b) Peak positions of G peak ( $\omega_G$ ). (c) FWHM of G peak ( $\Gamma_G$ ). (d) Peak positions of 2D peak ( $\omega_{2D}$ )
